# Supplementary material
Source: MDPI journal article supplement (https://www.mdpi.com/2075-163X/13/7/864)
Supplement: s1 [file s1 › minerals-2437540-supplementary.pdf]

Supplementary materials

# Infrared and Raman Spectroscopy of Mullite Ceramics Synthesized from Fly Ash and Kaolin

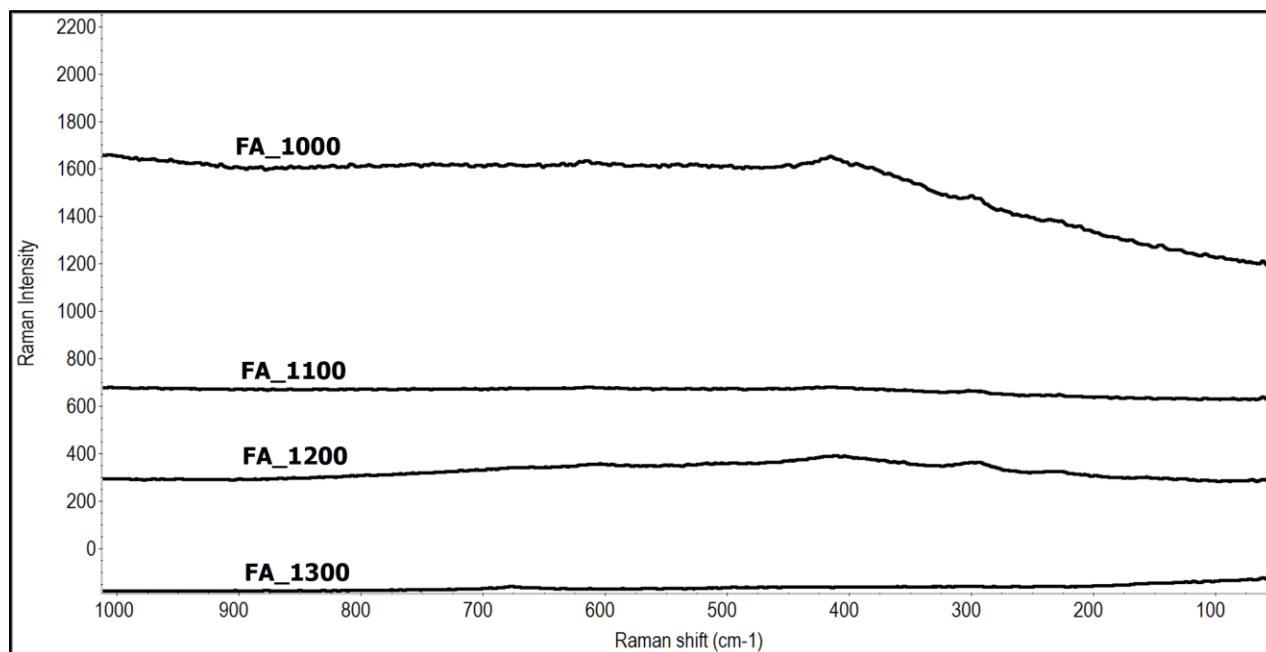

**Figure S1.** Uncorrected Raman spectra of annealed FA samples.

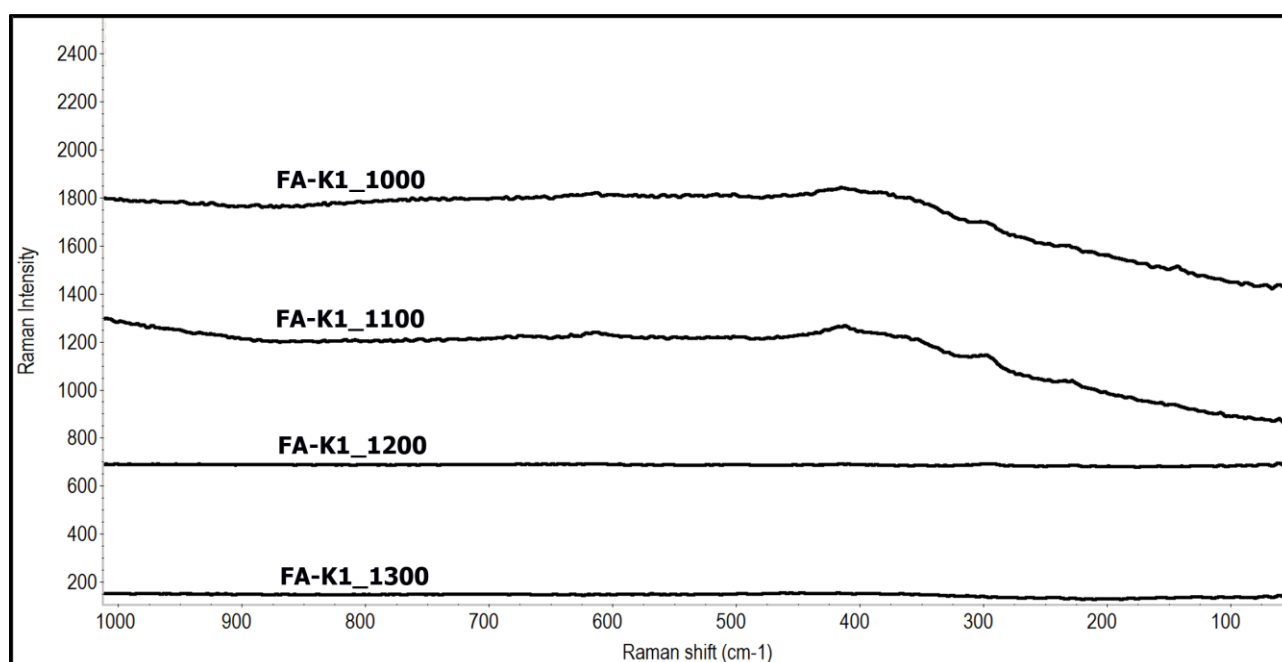

**Figure S2.** Uncorrected Raman spectra of annealed FA-K1 samples.

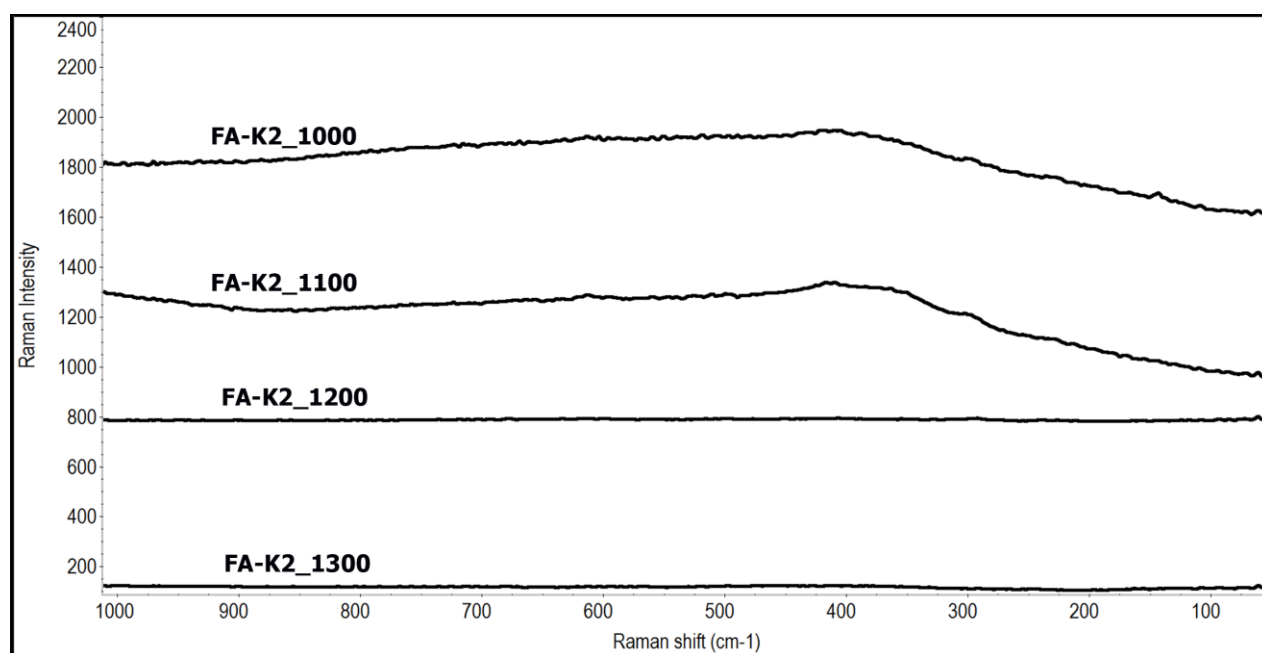

Figure S3. Uncorrected Raman spectra of annealed FA-K2 samples.

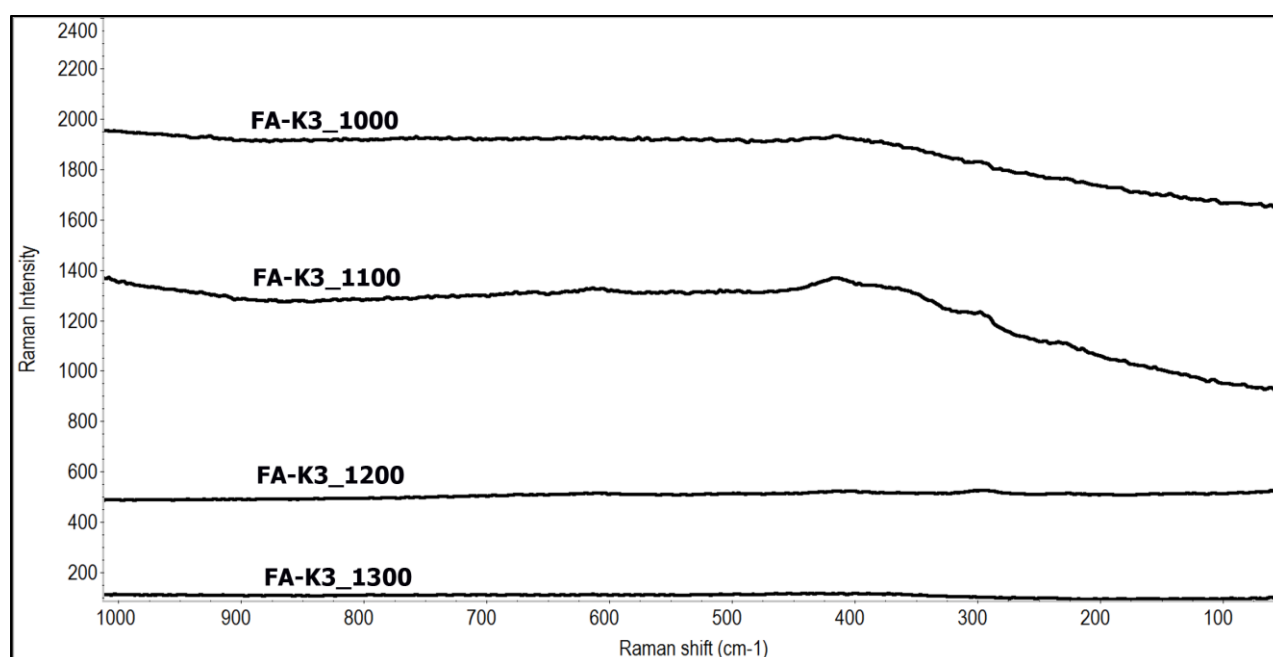

Figure S4. Uncorrected Raman spectra of annealed FA-K3 samples.
